# Supplementary material
Source: PubMed Central journal article supplement (PMC4504786)
Supplement: NIHMS695856-supplement.pdf [file NIHMS695856-supplement.pdf]

A

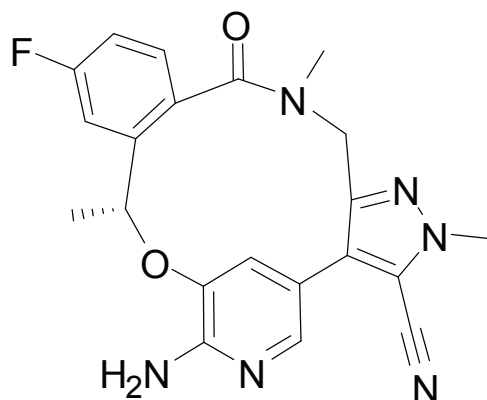

B

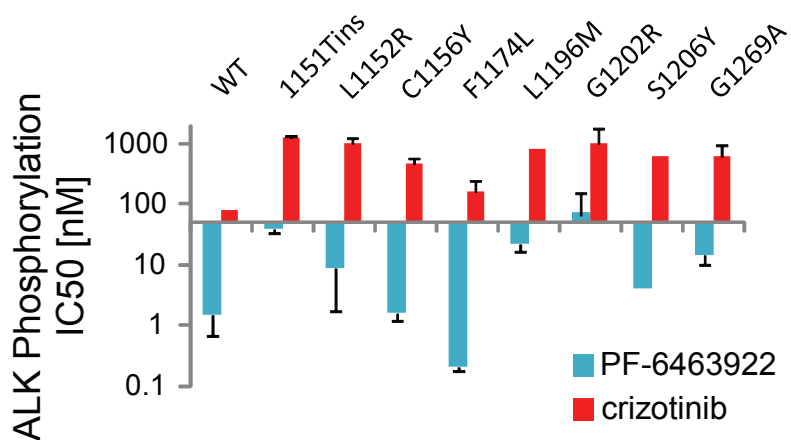

Figure S1: Related to Figure 1.

(A) Chemical structure of PF-06463922: (10R)-7-amino-12-fluoro-2,10,16-trimethyl-15-oxo-10,15,16,17-(metheno)pyrazolo[4,3h][2,5,11]benzoxadiazacyclotetradecine-3-carbonitrile.

(B) IC<sub>50</sub> values of crizotinib and PF-06463922 for the inhibition ALK autophosphorylation in engineered NIH3T3 cells expressing the indicated ALK fusion mutant. Values are presented as mean  $\pm$  SD (n=3).

Table S1 related to Figure 1.

PF-06463922 inhibitory potency against WT and ALK resistant mutants in cell assays

| IC <sub>50</sub> < 100 nM                                                                                 | <sup>a</sup> Cellular ALK Phosphorylation Mean<br><sup>c</sup> IC <sub>50</sub> (nM) |                          |                         |                        | <sup>b</sup> Cell Proliferation<br>Mean <sup>c</sup> IC <sub>50</sub> (nM) |                          |                      |                       |
|-----------------------------------------------------------------------------------------------------------|--------------------------------------------------------------------------------------|--------------------------|-------------------------|------------------------|----------------------------------------------------------------------------|--------------------------|----------------------|-----------------------|
|                                                                                                           |                                                                                      |                          |                         |                        |                                                                            |                          |                      |                       |
|                                                                                                           | Target/Cell Line                                                                     | PF-6463922               | Xalkori                 | ceritinib              | CH-5424802                                                                 | PF-6463922               | Xalkori              | ceritinib             |
| EML4-ALK v1/<br>H3122 (endogenous)<br>NIH3T3 (engineered)<br>BaF3 (engineered)                            | 1.9<br>1.5<br>3.6                                                                    | 82<br>80<br>90           | 102<br>NA<br>41         | 24<br>62<br>24         | 2.4<br>NA<br>2.7                                                           | 81<br>NA<br>88           | 30<br>NA<br>25       | 27<br>NA<br>39        |
| EML4-ALK v3a/b/<br>H2228(endogenous)<br>NIH3T3 (engineered)                                               | 1.3<br>1.0                                                                           | 118<br>50                | NA<br>NA                | NA<br>NA               | 4.1<br>NA                                                                  | 60<br>NA                 | NA<br>NA             | 13<br>NA              |
| EML4-ALK <sup>L1196M</sup> /<br>H3122 (engineered)<br>NIH3T3 (engineered)<br>BaF3 (engineered)            | 15<br>21<br>43                                                                       | 535<br>843<br>1154       | 142<br>NA<br>70         | 200<br>250<br>113      | 30<br>NA<br>28                                                             | 973<br>NA<br>420         | NA<br>NA<br>26       | 119<br>NA<br>79       |
| EML4-ALK <sup>G1269A</sup> /<br>SNU2535<br>H3122 (engineered)<br>NIH3T3 (engineered)<br>BaF3 (engineered) | 19<br>14<br>15<br>80                                                                 | 507<br>504<br>605<br>689 | 195<br>137<br>NA<br>134 | 173<br>64<br>NA<br>112 | 45<br>20<br>NA<br>36                                                       | 3845<br>623<br>NA<br>466 | 96<br>NA<br>NA<br>21 | 161<br>NA<br>NA<br>73 |
| EML4-ALK <sup>G1202R</sup> /<br>NIH3T3 (engineered)<br>BaF3 (engineered)                                  | 77<br>113                                                                            | 1003<br>562              | >1000<br>549            | >1000<br>362           | NA<br>80                                                                   | NA<br>560                | NA<br>309            | NA<br>595             |
| EML4-ALK <sup>I1151Tins</sup> /<br>NIH3T3 (engineered)<br>BaF3 (engineered)                               | 38<br>50                                                                             | 1268<br>902              | 1066<br>296             | NA<br>126              | NA<br>57                                                                   | NA<br>783                | NA<br>200            | NA<br>172             |
| EML4-ALK <sup>L1152R</sup> /<br>NIH3T3 (engineered)                                                       | 9                                                                                    | 1026                     | NA                      | NA                     | NA                                                                         | NA                       | NA                   | NA                    |
| EML4-ALK <sup>S1206Y</sup> /<br>NIH3T3 (engineered)<br>BaF3 (engineered)                                  | 4.2<br>3.2                                                                           | 626<br>152               | NA<br>60                | NA<br>29               | NA<br>5.9                                                                  | NA<br>140                | NA<br>26             | NA<br>33              |
| EML4-ALK <sup>C1156Y</sup> /<br>NIH3T3 (engineered)<br>BaF3 (engineered)                                  | 1.6<br>15                                                                            | 478<br>406               | NA<br>177               | NA<br>21               | NA<br>6.7                                                                  | NA<br>166                | NA<br>50             | NA<br>30              |
| EML4-ALK <sup>F1174L</sup> /<br>NIH3T3 (engineered)<br>BaF3 (engineered)                                  | 0.2<br>4.0                                                                           | 165<br>150               | NA<br>161               | NA<br>26               | NA<br>4.8                                                                  | NA<br>106                | NA<br>40             | NA<br>28              |
| NPM-ALK/<br>Kapas299(endogenous)                                                                          | 1.2                                                                                  | 38                       | NA                      | NA                     | 3                                                                          | 62                       | NA                   | 27                    |
| KIF5B-ALK v1<br>NIH3T3 (engineered)                                                                       | 0.5                                                                                  | 29                       | NA                      | NA                     | NA                                                                         | NA                       | NA                   | NA                    |

<sup>a</sup>: The ALK-tyrosine 1604 phosphorylation in cell lysates was determined utilizing a commercially available PathScan® Phospho-ALK Chemiluminescent Sandwich ELISA Kit (Cell Signaling Technologies).

<sup>b</sup>: Cell proliferation was determined by utilizing a commercially available CellTiter Glow assay kit (Promega).

<sup>d</sup>: IC<sub>50</sub> values were calculated by concentration-response curve fitting using a four-parameter analytical method.

Definitions: NA = not available. Mean values are derived from n = 2-101.

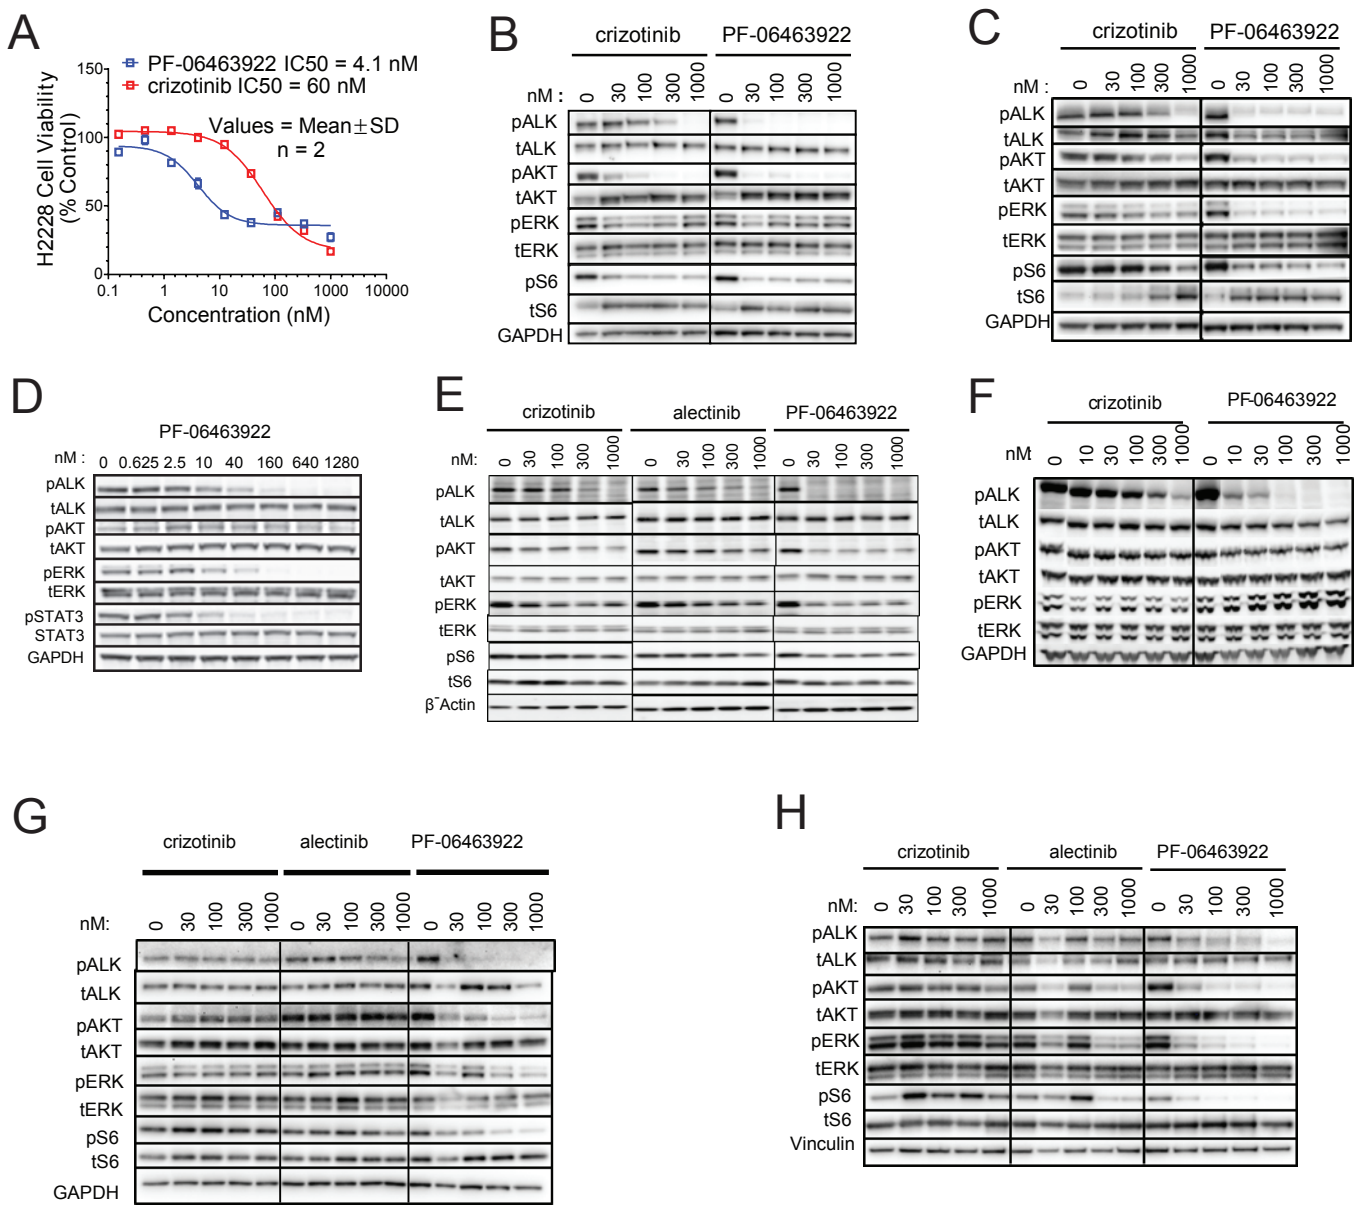

Figure S2. Related to Figure 2.

Comparison of PF-06463922 and other clinically available ALK inhibitors. (A) Cell viability assay of H2228 cells treated with the indicated doses of crizotinib or PF-06463922 for 72 hours. (B) Inhibition of ALK fusion mediated signal transduction analysis in H2228 cells treated with the indicated doses of crizotinib or PF-06463922 for 6 hours. (C) Inhibition of ALK fusion mediated signal transduction analysis in H3122 EML4-ALK<sup>WT</sup> cells treated with the indicated doses of crizotinib or PF-06463922 for 6 hours (cf. Fig. 2A). (D) Inhibition of ALK fusion mediated signal transduction analysis in H3122 EML4-ALK<sup>L1196M</sup> cells treated with the indicated doses of crizotinib or PF-06463922 for 3 hours (cf. Fig. 2B). (E) Inhibition of ALK fusion mediated signal transduction analysis in H3122 EML4-ALK<sup>V1280L</sup> cells treated with the indicated doses of crizotinib, alectinib or PF-06463922 for 6 hours (cf. Fig. 2F). (F) Inhibition of ALK fusion mediated signal transduction analysis in SNU2535 (EML4-ALK<sup>G1269A</sup>) cells treated with the indicated doses of crizotinib or PF-06463922 for 3 hours (cf. Fig. 2G). (G) Inhibition of ALK fusion mediated signal transduction analysis in MGH021-5 (SQSTM1-ALK<sup>G1202R</sup>) cells treated with the indicated doses of crizotinib, alectinib or PF-06463922 for 6 hours (cf. Fig. 2H). (H) Inhibition of ALK fusion mediated signal transduction analysis in MGH056-1 (EML4-ALK<sup>I1171T</sup>) cells treated with the indicated doses of crizotinib, alectinib or PF-06463922 for 6 hours (cf. Fig. 2I). Undesired conditions were removed but all images belong to the same original images.

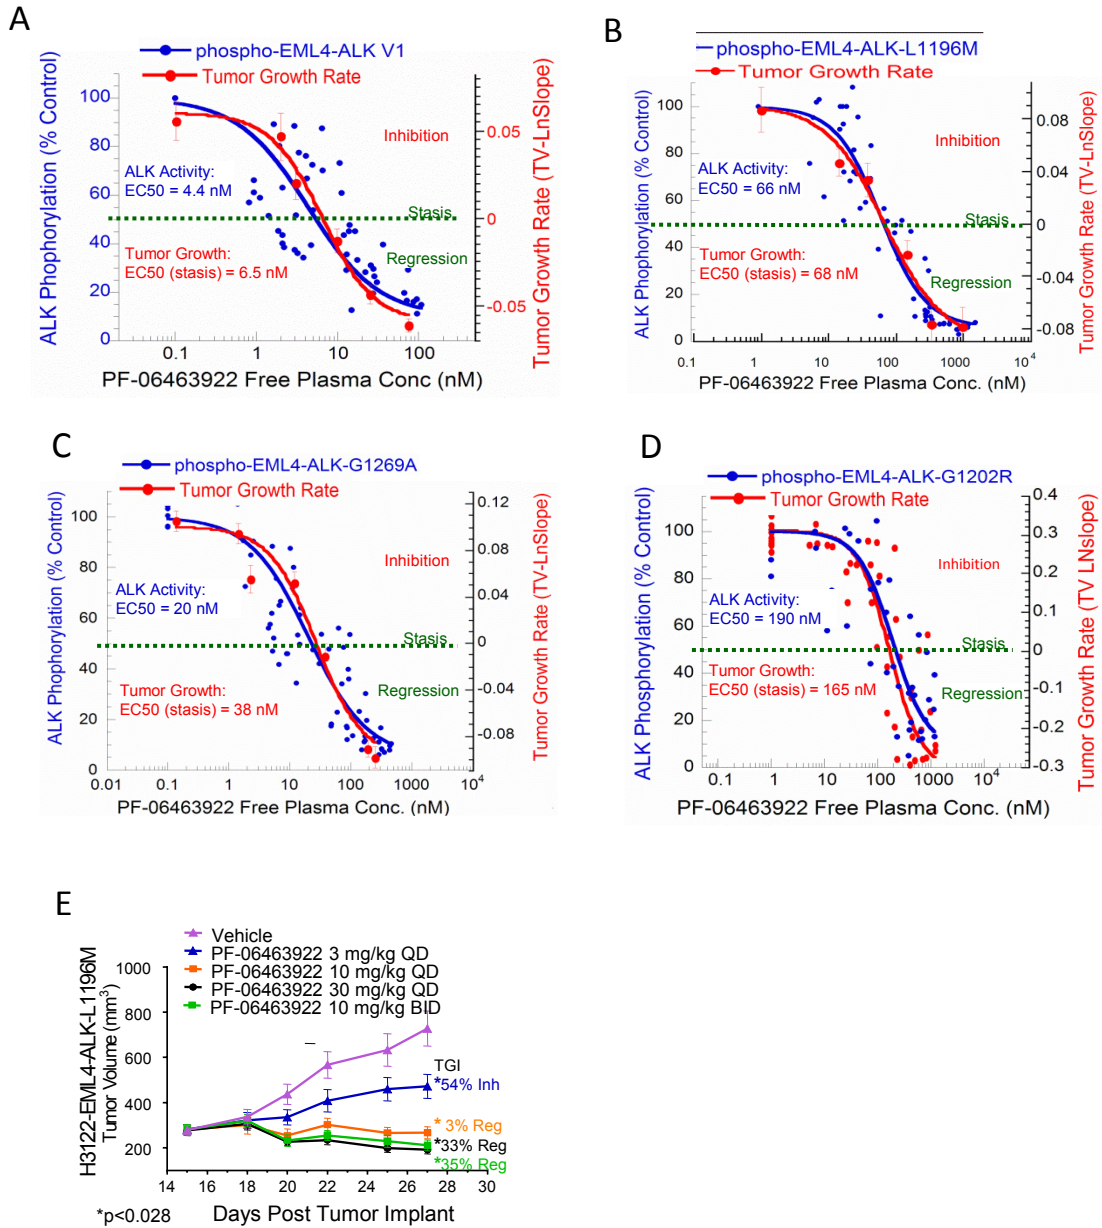

Figure S3 related to Figure 3: PF-06463922 antitumor efficacy in ALK fusion- driven subcutaneous tumor xenograft models in mice. (A-D) Hill plots showing relationships between PF-06463922 free plasma concentration to ALK target inhibition or tumor growth rate in H3122 model expressing endogenous EML4-ALK<sup>WT</sup> (A), in H3122 model expressing engineered EML4-ALK<sup>L1196M</sup> (B), in H3122 model expressing engineered human EML4-ALK<sup>G1269A</sup> (C) and in 3T3 model expressing engineered human EML4-ALK<sup>G1202R</sup> (D) (cf. Fig. 3A-D). (E) Comparison in antitumor efficacies of PF-06463922 QD vs. BID oral dosing schedules in the H3122-EML4-ALK<sup>L1196M</sup> model. Tumor growth, ALK phosphorylation and plasma concentration values are presented as mean  $\pm$  SEM (n=8-12).

Table S2 related to Figure 3.

Antitumor Efficacy of PF-06463922 in ALK Fusion Positive Tumor Models *In Vivo*

| Tumor Model/<br>Study #            | Initial <sup>a</sup> TV<br>(mm <sup>3</sup> ) | Route &<br>Schedule<br>& Dose<br>(mg/kg/day) | PK Parameters <sup>b</sup><br>(nM free) |      |      | % pALK Target Inhibition<br>(hr) |    |    |    |    |    |                   | Antitumor Efficacy         |                                       |          |                                               |
|------------------------------------|-----------------------------------------------|----------------------------------------------|-----------------------------------------|------|------|----------------------------------|----|----|----|----|----|-------------------|----------------------------|---------------------------------------|----------|-----------------------------------------------|
|                                    |                                               |                                              | Cmax                                    | Cmin | Cave | 0.5                              | 1  | 3  | 7  | 8  | 24 | <sup>d</sup> Emax | <sup>e</sup> %TGI<br>(Day) | <sup>f</sup> %<br>Regression<br>(Day) | Emax     | <sup>g</sup> P Value<br>Treated<br>vs control |
| H3122-<br>EML4-<br>ALK-<br>L1196M  | 280                                           | PO,QD, 3                                     | 521                                     |      | 102  | 61                               | 74 | 73 | 57 | NA | 41 | NA                | 54%<br>(d13)               | NA                                    | <        | 0.02833                                       |
|                                    | 280                                           | PO,QD, 10                                    | 1636                                    |      | 508  | 81                               | 90 | 57 | 92 | NA | 47 | NA                | NA                         | 3% (d13)                              | <        | <0.00001                                      |
|                                    | 280                                           | PO,QD, 30                                    | 3193                                    |      | 1728 | 93                               | 95 | 91 | 97 | NA | 68 | NA                | NA                         | 33% (d13)                             | =        | <0.00001                                      |
|                                    | 280                                           | PO,BID, 10                                   | 787                                     |      | 395  | NA                               | 88 | 84 | 71 | 89 | 30 | NA                | NA                         | 35% (d13)                             | =        | <0.00001                                      |
| H3122-<br>EML4-<br>ALK-<br>L1196M  | 310                                           | SC Infus, 0.5                                | 15                                      | 15   | 15   | 6.2                              |    |    |    |    | <  | 49%<br>(d13)      | NA                         | <                                     | 0.00342  |                                               |
|                                    | 310                                           | SC Infus, 1.5                                | 38                                      | 38   | 38   | 27                               |    |    |    |    | <  | 84%<br>(d13)      | NA                         | <                                     | <0.00001 |                                               |
|                                    | 310                                           | SC Infus, 5                                  | 150                                     | 150  | 150  | 60                               |    |    |    |    | <  | NA                | 30% (d13)                  | <                                     | <0.00001 |                                               |
|                                    | 310                                           | SC Infus, 15                                 | 346                                     | 346  | 346  | 89                               |    |    |    |    | =  | NA                | 57% (d13)                  | =                                     | <0.00001 |                                               |
|                                    | 310                                           | SC Infus, 40                                 | 961                                     | 961  | 961  | 94                               |    |    |    |    | =  | NA                | 57% (d13)                  | =                                     | <0.00001 |                                               |
| H3122-<br>EML4-<br>ALK-<br>G1269A  | 220                                           | SC Infus, 0.2                                | 3.2                                     | 3.2  | 3.2  | 9                                |    |    |    |    | <  | 9% (d12)          | NA                         | <                                     | 0.33445  |                                               |
|                                    | 220                                           | SC Infus, 0.6                                | 5.2                                     | 5.2  | 5.2  | 59                               |    |    |    |    | <  | 59%<br>(d12)      | NA                         | <                                     | 0.00069  |                                               |
|                                    | 220                                           | SC Infus, 2                                  | 23                                      | 23   | 23   | 41                               |    |    |    |    | <  | 50%<br>(d12)      | NA                         | <                                     | 0.00546  |                                               |
|                                    | 220                                           | SC Infus, 6                                  | 65                                      | 65   | 65   | 49                               |    |    |    |    | <  | 96% (d12)         | NA                         | <                                     | <0.00001 |                                               |
|                                    | 220                                           | SC Infus, 20                                 | 272                                     | 272  | 272  | 86                               |    |    |    |    | =  | NA                | 52% (d12)                  | =                                     | <0.00001 |                                               |
|                                    | 220                                           | SC Infus, 25                                 | 366                                     | 366  | 366  | 87                               |    |    |    |    | =  | NA                | 59% (d12)                  | =                                     | <0.00001 |                                               |
| NIH3T3-<br>EML4-<br>ALK-<br>G1202R | 340                                           | SC Infus, 0.75                               | 28                                      | 28   | 28   | 14                               |    |    |    |    | <  | 0% (d6)           | NA                         | <                                     | 0.05952  |                                               |
|                                    | 340                                           | SC Infus, 2.5                                | 109                                     | 109  | 109  | 8                                |    |    |    |    | <  | 71 (d6)           | NA                         | <                                     | 0.00070  |                                               |
|                                    | 340                                           | SC Infus, 7.5                                | 388                                     | 388  | 388  | 49                               |    |    |    |    | <  | NA                | 34% (d6)                   | <                                     | <0.00001 |                                               |
|                                    | 340                                           | SC Infus, 20                                 | 624                                     | 624  | 624  | 80                               |    |    |    |    | =  | NA                | 76% (d6)                   | =                                     | <0.00001 |                                               |
|                                    | 340                                           | SC Infus, 25                                 | 725                                     | 725  | 725  | 82                               |    |    |    |    | =  | NA                | 77% (d6)                   | =                                     | <0.00001 |                                               |
| H3122<br>(EML4-<br>ALK V1)         | 280                                           | SC Infus, 0.06                               | 2.0                                     | 2.0  | 2.0  | 45                               |    |    |    |    | <  | 0% (d13)          | NA                         | <                                     | 0.01368  |                                               |
|                                    | 280                                           | SC Infus, 0.2                                | 3.1                                     | 3.1  | 3.1  | 43                               |    |    |    |    | <  | 49%<br>(d13)      | NA                         | <                                     | 0.00019  |                                               |
|                                    | 280                                           | SC Infus, 0.6                                | 10                                      | 10   | 10   | 46                               |    |    |    |    | <  | NA                | 6% (d13)                   | <                                     | <0.00001 |                                               |
|                                    | 280                                           | SC Infus, 1.5                                | 25                                      | 25   | 25   | 70                               |    |    |    |    | <  | NA                | 45% (d13)                  | <                                     | <0.00001 |                                               |
|                                    | 280                                           | SC Infus, 3                                  | 75                                      | 75   | 75   | 83                               |    |    |    |    | =  | NA                | 59% (d13)                  | =                                     | <0.00001 |                                               |

a: TV (tumor volume) was measured by electronic caliper.

b: Plasma drug concentrations were measured by LCMS, and the fraction of unbound (free) concentrations were used.

c: pALK levels in tumors were measured by ELISA assay using the tumor protein extracts.

d: Emax = maximum effect.

e: %TGI (tumor growth inhibition) was calculated as:  $100 * (\text{tumor volume}_{\text{final}} - \text{tumor volume}_{\text{initial}} \text{ for the treated group}) / (\text{tumor volume}_{\text{final}} - \text{tumor volume}_{\text{initial}} \text{ for vehicle group})$

f: % tumor regression was calculated as:  $1 - (\text{tumor volume}_{\text{final}} / \text{tumor volume}_{\text{initial}})$

g: p values were derived by ANOVA analysis.

Table S3 related to Figure 3.

PF-06463922 Hill equation parameters in *in vivo* tumor xenograft studies in mice.

| Tumor Model/<br>Study type                                             | PF-06463922<br>dosing Route            | Hill equation parameters                                                                                                               |                                                                                                                                               |
|------------------------------------------------------------------------|----------------------------------------|----------------------------------------------------------------------------------------------------------------------------------------|-----------------------------------------------------------------------------------------------------------------------------------------------|
|                                                                        |                                        | <sup>a</sup> ALK phosphorylation                                                                                                       | <sup>b</sup> Tumor growth rate <sup>60</sup>                                                                                                  |
| H3122-EML4-<br>ALK <sup>L1196M</sup> / <sup>a</sup> SC<br>tumor growth | <sup>c</sup> SC mini-<br>pump infusion | fixed E <sub>max</sub> = 100,<br>fixed Baseline = 6,<br>Slop = -1.3 ± 0.13,<br>IC <sub>50</sub> = 66 ± 6.3 nM, R <sup>2</sup> = 0.89.  | fixed E <sub>max</sub> = 0.09,<br>fixed Baseline = -0.09,<br>Slop = -1.02 ± 0.16,<br>IC <sub>50</sub> = 68 ± 12 nM, R <sup>2</sup> = 0.98.    |
| NIH3T3-EML4-<br>ALK <sup>G1202R</sup> /SC<br>tumor growth              | SC mini-pump<br>infusion               | fixed E <sub>max</sub> = 100,<br>fixed Baseline = 8,<br>Slop = -1.35 ± 0.29,<br>IC <sub>50</sub> = 190 ± 34 nM, R <sup>2</sup> = 0.67. | fixed E <sub>max</sub> = 0.31,<br>fixed Baseline = -0.31,<br>Slop = -1.44 ± 0.23,<br>IC <sub>50</sub> = 165 ± 20 nM, R <sup>2</sup> = 0.82.   |
| H3122-EML4-<br>ALK <sup>G1269A</sup> /SC<br>tumor growth               | SC mini-pump<br>infusion               | fixed E <sub>max</sub> = 100,<br>fixed Baseline = 5,<br>Slop = -0.9 ± 0.11,<br>IC <sub>50</sub> = 20 ± 3.0, R <sup>2</sup> = 0.79.     | fixed E <sub>max</sub> = 0.09,<br>fixed Baseline = -0.11,<br>Slop = -1.05 ± 0.22,<br>IC <sub>50</sub> = 38 ± 8.8 nM, R <sup>2</sup> = 0.96.   |
| H3122 (EML4-<br>ALK V1)/SC<br>tumor growth                             | SC mini-pump<br>infusion               | fixed E <sub>max</sub> = 100,<br>fixed Baseline = 10,<br>fixed Slop = -1,<br>IC <sub>50</sub> = 4.4 ± 0.65, R <sup>2</sup> = 0.62.     | fixed E <sub>max</sub> = 0.06,<br>fixed Baseline = -0.06,<br>Slop = -1.35 ± 0.18,<br>IC <sub>50</sub> = 6.5 ± 0.75 nM, R <sup>2</sup> = 0.98. |

<sup>a</sup>: ALK phosphorylation in tumors were measured by ELISA assay.

<sup>b</sup>: Tumor growth rate was determined as described by Jackson, B. C. 1992.

<sup>c</sup>: SC = subcutaneous.

Table S4 related to Figure 3.

PF-06463922 efficacious concentrations derived from PKPD studies in ALK-fusion positive tumor models in mice

| Model/ Regimen                                         | <sup>a</sup> ALK phosphorylation<br><sup>b</sup> Ceff (free nM) |                  |                  |                               | Antitumor Efficacy<br>Ceff (free nM)    |                                      |                                            |
|--------------------------------------------------------|-----------------------------------------------------------------|------------------|------------------|-------------------------------|-----------------------------------------|--------------------------------------|--------------------------------------------|
|                                                        | <sup>c</sup> EC <sub>50</sub>                                   | EC <sub>65</sub> | EC <sub>90</sub> | <sup>d</sup> E <sub>max</sub> | Tumor Stasis<br>(100% <sup>e</sup> TGI) | Tumor 30%<br><sup>f</sup> regression | E <sub>max</sub><br>(52-86%<br>regression) |
| H3122-EML4 -ALK <sup>L1196M</sup><br>SC tumor/infusion | 66                                                              | 106              | 356              | NA                            | 68                                      | 126                                  | 346                                        |
| 3T3-EML4-ALK <sup>G1202R</sup><br>SC tumor/infusion    | 190                                                             | 285              | 682              | NA                            | 165                                     | 254                                  | 624                                        |
| H3122-EML4-ALK <sup>G1269A</sup><br>SC tumor/infusion  | 20                                                              | 40               | 232              | 272                           | 38                                      | 68                                   | 272                                        |
| H3122 ( EML4-ALK V1)<br>SC infusion                    | 4.4                                                             | 8                | 39               | NA                            | 6.5                                     | 10                                   | 25-75                                      |
| H3122 ( EML4-ALK V1)<br>brain tumor/infusion           | NA                                                              | NA               | NA               | 157                           | NA                                      | NA                                   | 126                                        |

<sup>a</sup>: ALK phosphorylation in tumors was determined by ELISA assay using the tumor protein extracts.

<sup>b</sup>: Ceff = Efficacious concentration. Unbound (free) plasma drug concentrations were used.

<sup>c</sup>: EC<sub>50</sub> = 50% of Effective concentrations.

<sup>d</sup>: E<sub>max</sub> = maximal efficacy observed.

<sup>e</sup>: TGI = tumor growth inhibition

<sup>f</sup>: % tumor regression was calculated as:  $1 - (\text{tumor volume}_{\text{final}} / \text{tumor volume}_{\text{initial}})$

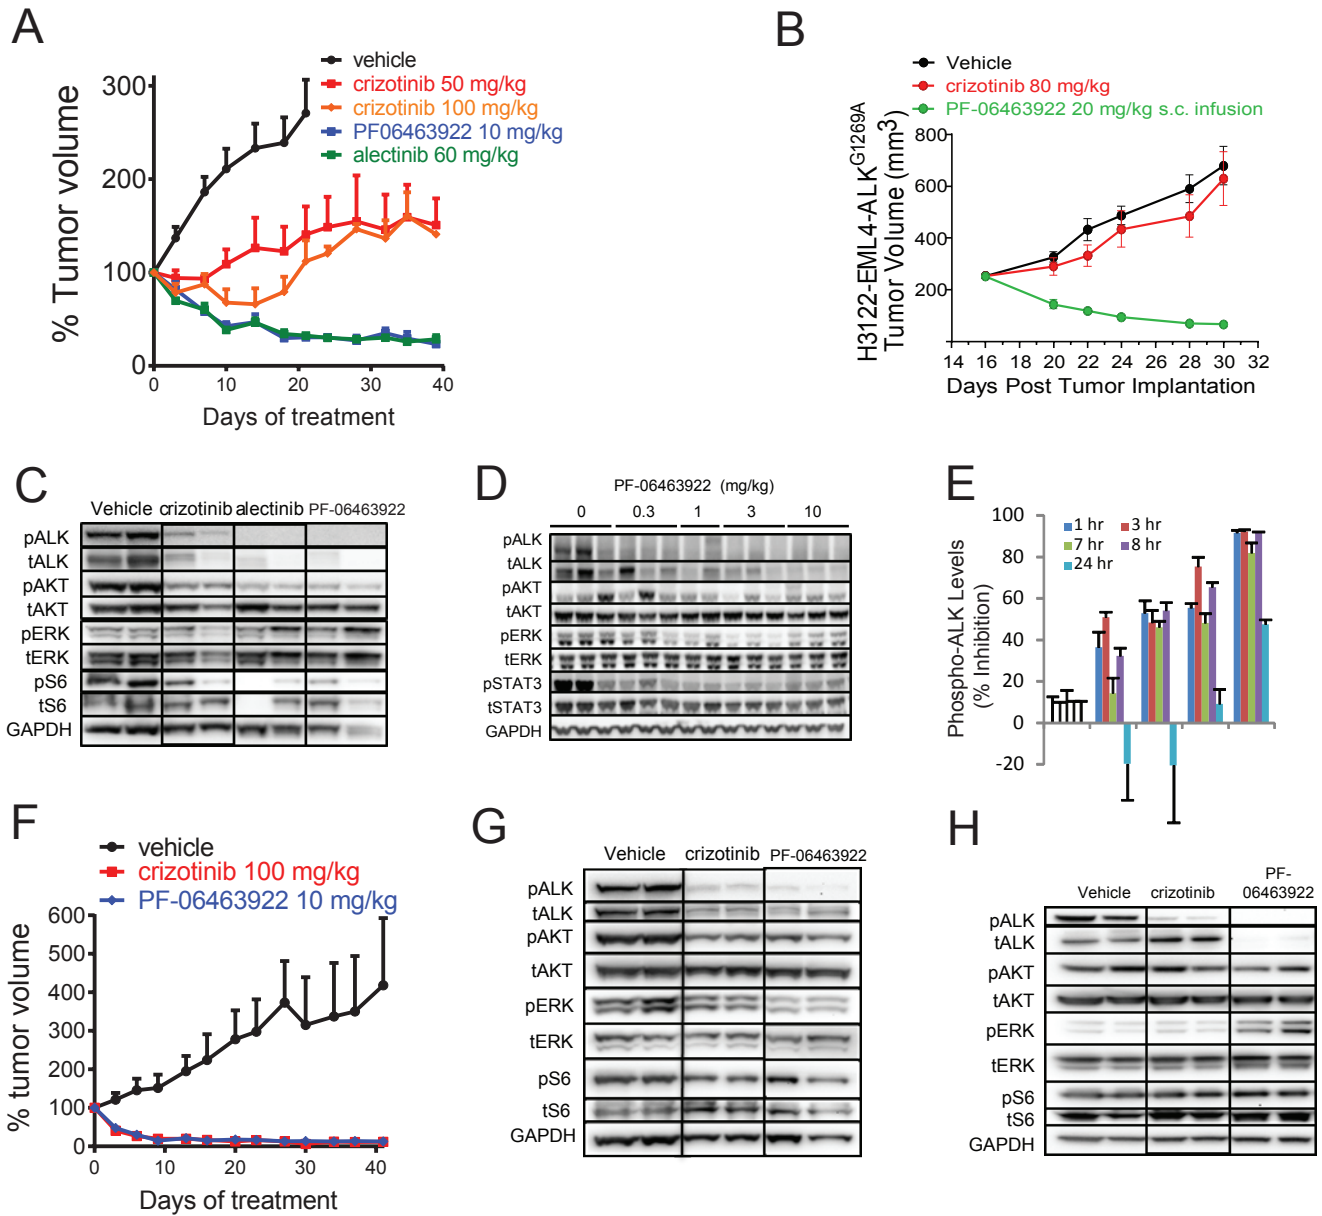

Figure S4 related to Figure 4.

PF-06463922 antitumor efficacy in ALK fusion driven subcutaneous tumor xenograft models in mice. (A) Subcutaneous tumor growth of H3122 cell line treated with crizotinib 50 mg/kg and 100 mg/kg QD or alectinib 60 mg/kg QD or PF-06463922 10 mg/kg BID for 40 days. Values represent mean + SEM (n=5-10) (B) Subcutaneous tumor growth of H3122 EML4-ALK<sup>G1269A</sup> tumor model treated with crizotinib 75 mg/kg oral BID or PF-06463922 20 mg/kg pump infusion for 30 days. Values represent mean ± SEM (n=12). (C) Pharmacodynamic analysis of H3122-EML4-ALK<sup>WT</sup> subcutaneous tumors treated for 3 days and collected 3 hours after last treatment. (D) Pharmacodynamic analysis of H3122-EML4-ALK<sup>L1196M</sup> subcutaneous tumors treated for 3 days and collected 3 hours after last treatment (cf. Fig. 4A). (E) phospho-ALK quantification by ELISA assay on H3122-EML4-ALK<sup>L1196M</sup> subcutaneous tumors treated for 3 days and collected at different time points after last treatment (cf. Fig. S5E). Values = Mean ± SEM (n=7-9). (F) Subcutaneous tumor growth of EML4-ALK<sup>WT</sup> MGH006 naive patient derived cell line treated with crizotinib 100 mg/kg QD or PF-06463922 10 mg/kg BID for 40 days. Values represent mean + SEM (n=6). (G) Pharmacodynamic analysis of MGH006 subcutaneous tumors treated for 3 days and collected 3 hours after last treatment. (H) Pharmacodynamic analysis of MGH051 subcutaneous tumors treated for 3 days and collected 3 hours after last treatment (cf. Fig. 4B).



**A**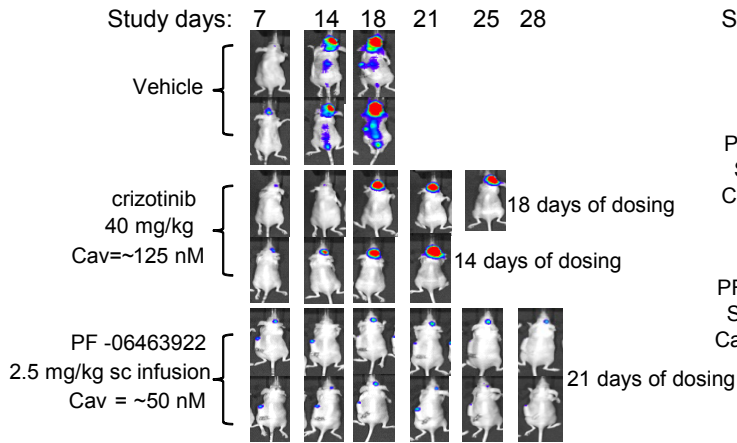**B**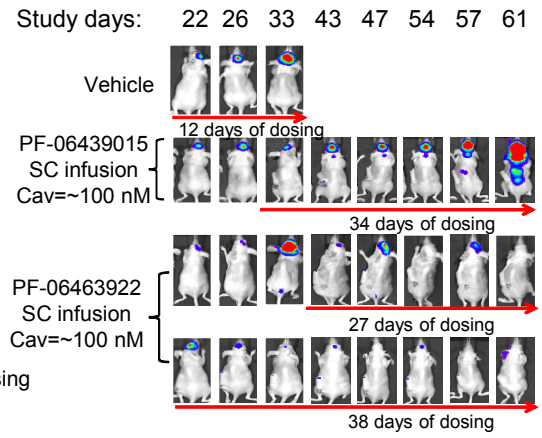**C**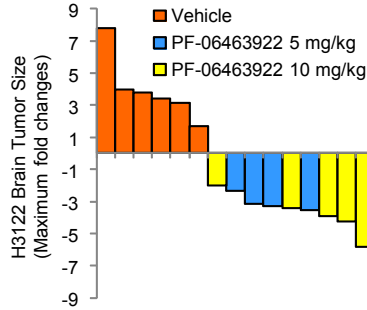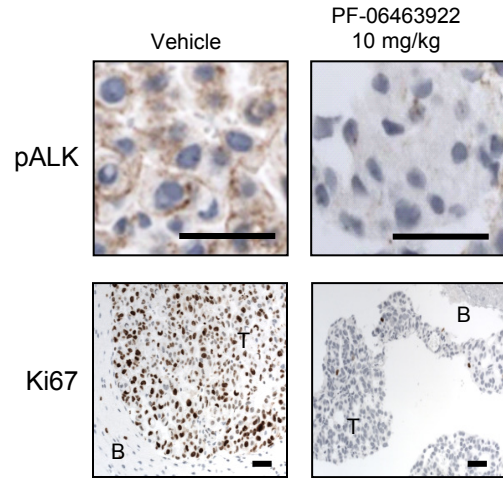**D**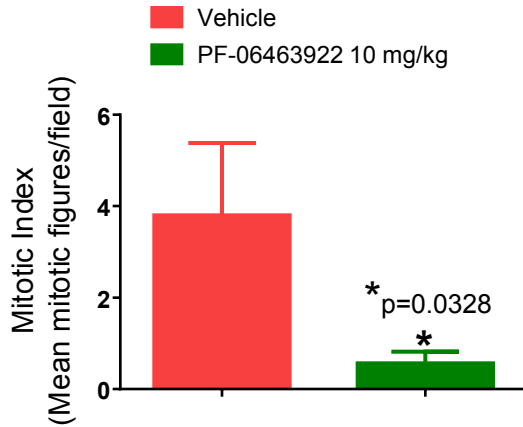

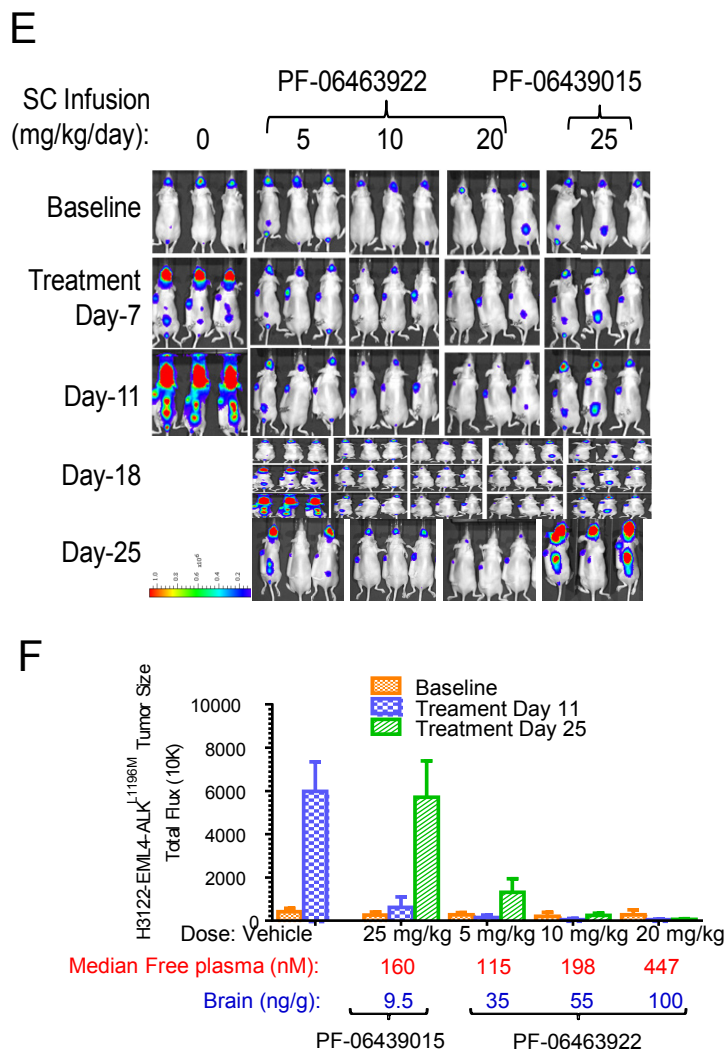

Figure S5. Related to Figure 5.

PF-06463922 antitumor efficacy in ALK fusion-driven brain intracranial tumor models in mice. (A) Representative IVIS images of mice H3122 EML4-ALK<sup>WT</sup> brain intracranial tumors. Animals treated with crizotinib or PF-06463922 as indicated (cf. Fig. 5A-D). Cav (average plasma drug concentration) are mentioned. (B) Representative IVIS images of mice bearing H3122 EML4-ALK<sup>WT</sup> brain intracranial tumors. Animals were treated with either PF-06463922 (6-12 mg/kg) or the related non-brain penetrant compound PF-06439015 (36 mg/kg). (C) Fold changes in individual tumor size following PF-06463922 treatment in H3122 EML4-ALK<sup>WT</sup> intracranial brain xenograft study and representative images of IHC stained for phospho-ALK or Ki67 in the H3122 intracranial brain tumors in the groups indicated. Scale bars in top two panels represent 25  $\mu$ m and scale bars in bottom two panels represent 50  $\mu$ m. (D) Decrease in mitotic index following PF-06463922 treatment (cf. Fig. 5A-D). Values are shown as mean  $\pm$  SEM (n=4-5) (E) Representative IVIS images of mice bearing H3122 EML4-ALK<sup>L196M</sup> brain intracranial tumors. Animals were treated with either PF-06463922 or the related non-brain penetrant compound PF-06439015 as indicated. (F) Fold changes in individual tumor size following PF-06463922 treatment in H3122 EML4-ALK<sup>L196M</sup> intracranial brain xenograft study. Plasma free and brain concentration of PF-06463922 are indicated for both compounds. Tumor volumes, mitotic index and PF-06463922 concentration values are presented as mean  $\pm$  SEM (n=4-6).

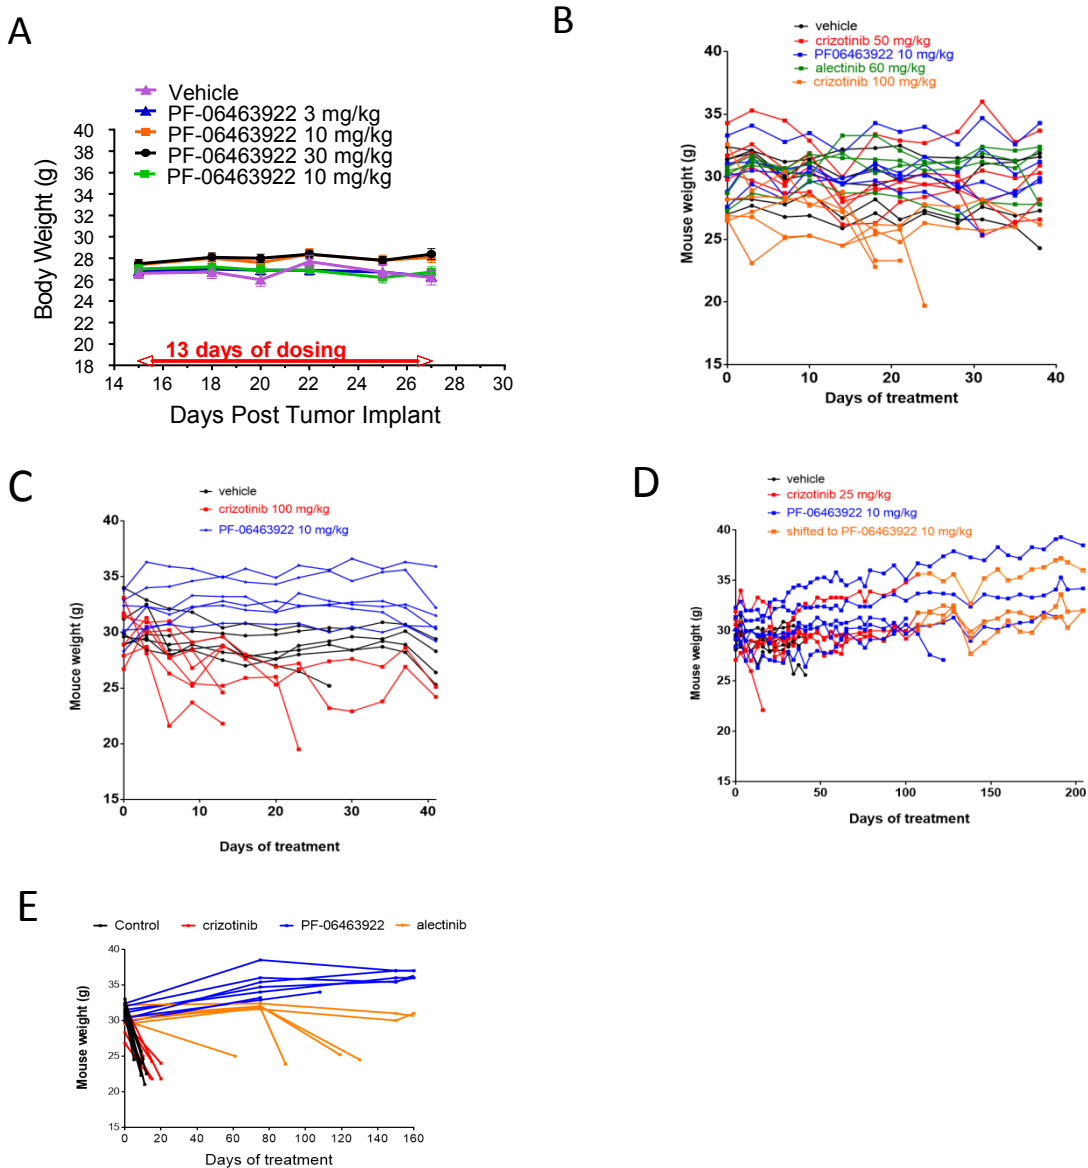

Figure S6 related to Figure 6.

Mouse body weight changes during compound treatment. (A) Mean mouse body weight in subcutaneous tumor growth study of H3122 EML4-ALK<sup>L1196M</sup> cell line treated with PF-06463922 QD or BID oral dosing from 3 to 10 mg/kg (cf. Fig. S5A). Values are shown as mean  $\pm$  SEM (n=15). (B) Individual mouse body weights in subcutaneous tumor growth study of H3122 EML4-ALK<sup>WT</sup> cell line treated with crizotinib 50 mg/kg and 100 mg/kg QD or alectinib 60 mg/kg QD or PF-06463922 10 mg/kg BID for 40 days (cf. Fig. S5B). (C) Individual mouse body weights in subcutaneous tumor growth study of EML4-ALK<sup>WT</sup> MGH006 naive patient derived cell line treated with crizotinib 100 mg/kg QD or PF-06463922 10 mg/kg BID for 40 days (cf. Fig. S5H). (D) Individual mouse body weights in long term subcutaneous tumor growth study of EML4-ALK<sup>WT</sup> MGH051 crizotinib resistant patient derived cell line treated with crizotinib 25 mg/kg QD or PF-06463922 10 mg/kg BID. The mice treated with crizotinib were shifted to PF-06463922 after 107 days of treatment (cf. Fig. 4B). (E) Individual mouse body weights in brain intracranial tumor growth study of H3122 EML4-ALK<sup>WT</sup> cell line treated with crizotinib 100 mg/kg QD or alectinib 60 mg/kg QD or PF-06463922 10 mg/kg BID for 150 days (cf. Fig. 5B).

# Supplemental Experimental Procedures

## IVIS imaging

The IVIS Lumina II imaging system (Xenogen Corporation, Alameda, CA) was used to monitor growth of brain tumors expressing luciferase. Mice received an intraperitoneal (i.p.) injection of d-luciferin (150 mg/kg, stock solution 15 mg/mL in sterile PBS, Goldbio, St. Louis, MO). After 10 min, isoflurane-anesthetized animals were placed in the imaging chamber. The bioluminescent images were acquired and data were analyzed based on total photon flux emission (photons) using Living Image software.

## Immunohistochemistry (IHC) Staining and IHC scoring

Following standard tissue processing, xenograft tumor specimens were formalin-fixed, paraffin-embedded and sectioned at a thickness of 4-5  $\mu\text{m}$  onto positively charged microscope slides. Deparaffinization, rehydration, antigen retrieval, and immunohistochemical staining techniques were performed using the fully automated BOND MAX instrument or BOND-III Staining System instrument (Leica Microsystems, Wetzlar, Germany). Heat induced epitope retrieval was performed with either Leica Bond Epitope Retrieval Solution 1 or 2. Nonspecific immunolabeling was reduced with Cyto Q Background Buster (Innovex Biosciences, Richmond, California, United States) or Protein Block either from Dako (DakoCytomation, Glostrup, Denmark) or Spring Bioscience (Pleasanton, California, United States). The specific primary antibody was detected using the Leica Bond Polymer Refine Detection system. Prior to immunolabeling development with 3,3'-diaminobenzidine tetrahydrochloride (DAB), endogenous peroxidase activity was blocked with hydrogen peroxide. All tumor sections were counterstained with hematoxylin, dehydrated, cleared, and mounted before pathological evaluation. Positive and negative control slides for each marker were evaluated to ensure the specificity of the staining. All samples were evaluated for cellular staining patterns (compared to controls) to ensure that consistent staining was present and to establish the range of the staining frequency/distribution and intensity. Any discrepancies noted in staining consistency may prompt additional or repeat staining prior to evaluation. Once the consistency of staining was confirmed, the staining frequency/distribution and staining intensity (if notably variable between samples) were tabulated for all samples; one or more additional slide reviews may be done at the conclusion of the initial evaluation to confirm patterns observed on the initial evaluation. Mean values and the range of staining scores were evaluated between groups and notable differences and/or patterns were compared between samples from vehicle (or untreated) and treated animals and between individual treatment groups.

## Supplemental References

Jackson, B. C. (1992). The theoretical foundations of cancer chemotherapy introduced by computer models. Academic Press, Inc., San Diego, CA, USA.
